# Supplementary material for: Coating and Patterning Functional Materials for Large Area Electrofluidic Arrays
Source: MDPI journal article supplement (doi:10.3390/ma9080707), 2016-08-19
Supplement: s1 [file s1]

# Supplementary Materials: Coating and Patterning Functional Materials for Large Area Electrofluidic Arrays

Hao Wu, Biao Tang, Robert A. Hayes, Yingying Dou, Yuanyuan Guo, Hongwei Jiang and Guofu Zhou

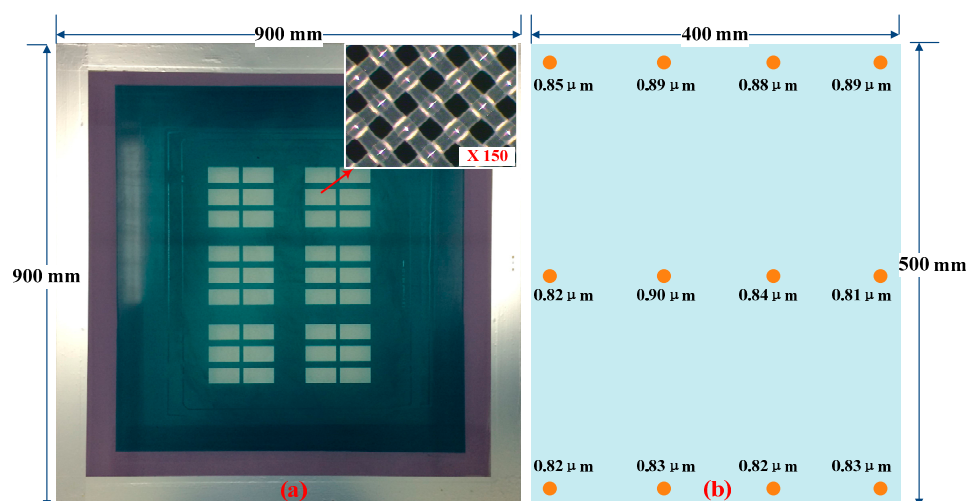

**Figure S1.** (a) Photograph of screen with 36 pads of 30 mm  $\times$  60 mm. Picture inset is the optical microscope photograph of mesh structure; (b) Amorphous fluoropolymer thickness data measured by stylus profiler on a 400 mm  $\times$  500 mm ITO glass substrate.

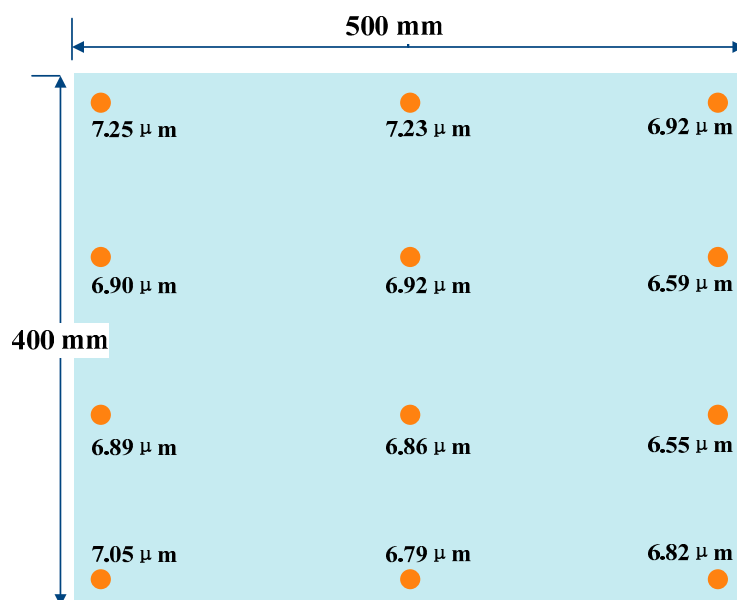

**Figure S2.** Photoresist thickness data measured by stylus profiler on a 400 mm  $\times$  500 mm ITO glass substrate.
